# Supplementary material
Source: Springer Nature journal article supplement (https://www.springermedizin.de/resource/supplementary/13058_2011_2947_MOESM6_ESM.pdf/9702952)

Trichrome

Trichrome

TWIST1

Nuclear Markup

ACTIVE

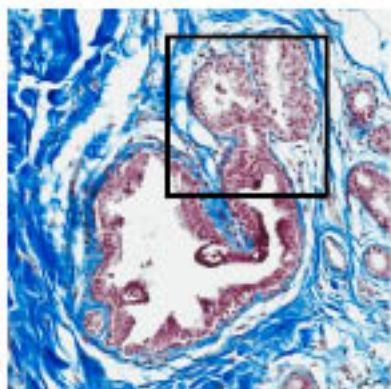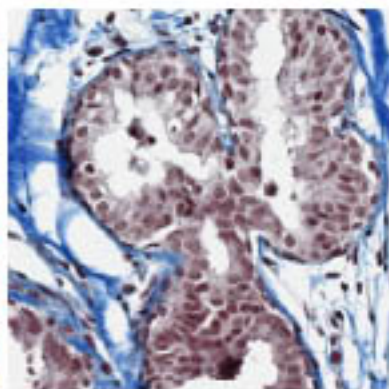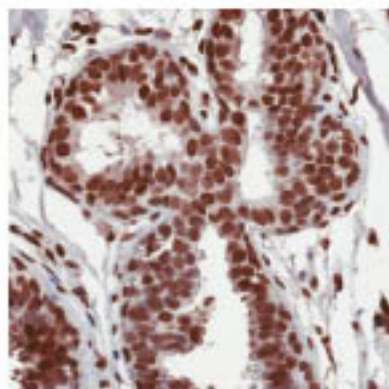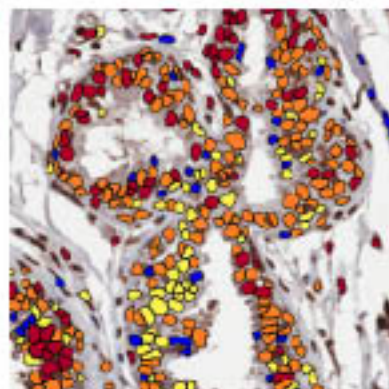

INACTIVE

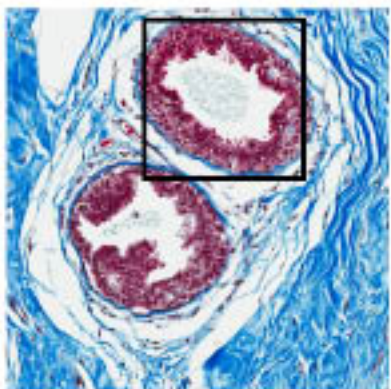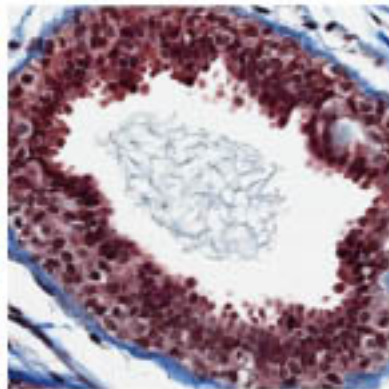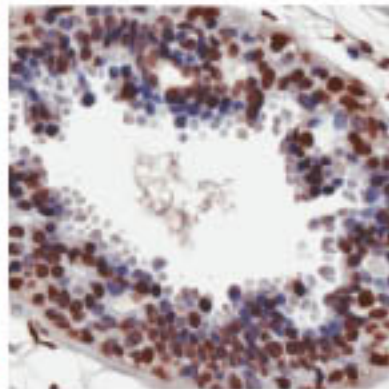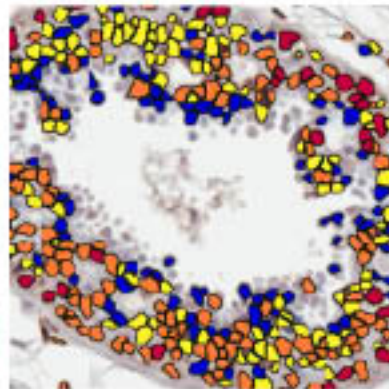

0 1+ 2+ 3+

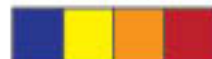

Markup Scale

Supplement: MOESM6 [file 9702952]
